# Supplementary material for: Evaluation of the Antimalarial Activity of the Hydroalcoholic Extract of Leaf of Leonotis ocymifolia (Burm. f.) Iwarsson (Lamiaceae) against Plasmodium berghei in Mice
Source: Evid Based Complement Alternat Med. 2020 Sep 17;2020:5384804. doi: 10.1155/2020/5384804 (PMC7519447; doi:10.1155/2020/5384804)
Supplement: Supplementary Materials — Figure 1: Leonotis ocymifolia (Burm. f.) Iwarsson (Lamiaceae) in its natural habitat. Figure 2: parasite viewed at microscope which depicts the presence of parasitemia on Day 0 of mice taking 100 mg/kg in the four-day suppression test. [file 5384804.f1.zip]

Archive with 2 entries (2 files):
- Materials/Supplematary 1  photograph of the plant and paracetemia at four day suppression test.docx
- Materials/Supplementary 2 raw data raw data of parasitemia.sav
